# Supplementary material for: Removal of estrogenic compoundsviairon electrocoagulation: impact of water quality and assessment of removal mechanisms
Source: Royal Society of Chemistry journal article supplement (doi:10.1039/c9ew00087a), 2019-01-01
Supplement: c9ew00087a1.pdf [file c9ew00087a1.pdf]

1 **Electronic Supplemental Information (ESI): Removal of estrogenic compounds via iron**  
2 **electrocoagulation: removal mechanisms and impact of water quality**

3 Emily K. Maher<sup>1</sup>, Kassidy N. O'Malley<sup>1</sup>, Joe Heffron<sup>1</sup>, Jingwan Huo<sup>2</sup>, Yin Wang<sup>2</sup>, Brooke K.  
4 Mayer<sup>1</sup>, Patrick J. McNamara<sup>1\*</sup>

5 <sup>1</sup>Department of Civil, Construction and Environmental Engineering, Marquette University,  
6 Milwaukee, WI 53211, USA.

7 <sup>2</sup>Department of Civil and Environmental Engineering, University of Wisconsin – Milwaukee,  
8 Milwaukee, WI 53210, USA.

9 \*Corresponding author

10 Patrick McNamara\*: (414)288-2188, patrick.mcnamara@mu.edu

11 Department of Civil, Construction and Environmental Engineering  
12 Marquette University  
13 1637 W Wisconsin Ave  
14 Milwaukee, WI 53233 USA.

15

16 **Table of Contents**

17 **S1: Physical-chemical properties of estrogenic compounds**

18 **S2: X-Ray Diffraction Patterns**

19 **S3: Post-hoc Statistical Analysis P-values**

20 **S3: Oxidation**

21 **S1: Physical-chemical properties of estrogenic compounds**

22 **Table S1.** Physical-chemical properties of estrogenic steroids

| Property                                                                     | Estrone (E1)                                                                      | 17β-<br>Estradiol<br>(E2)                                                         | Estriol (E3)                                                                       | 17α-<br>Ethinylestrad<br>iol (EE2)                                                  |
|------------------------------------------------------------------------------|-----------------------------------------------------------------------------------|-----------------------------------------------------------------------------------|------------------------------------------------------------------------------------|-------------------------------------------------------------------------------------|
| <b>Molecular Formula</b>                                                     | C <sub>18</sub> H <sub>22</sub> O <sub>2</sub>                                    | C <sub>18</sub> H <sub>24</sub> O <sub>2</sub>                                    | C <sub>18</sub> H <sub>24</sub> O <sub>3</sub>                                     | C <sub>20</sub> H <sub>24</sub> O <sub>2</sub>                                      |
| <b>CAS No.</b>                                                               | 53-16-7                                                                           | 50-28-2                                                                           | 50-27-1                                                                            | 57-63-6                                                                             |
| <b>Structure<sup>1</sup></b>                                                 | 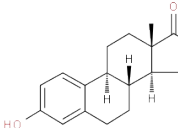 |  |  |  |
| <b>Type</b>                                                                  | Natural                                                                           | Natural                                                                           | Natural                                                                            | Synthetic                                                                           |
| <b>Molecular Weight (g mol<sup>-1</sup>)<sup>2</sup></b>                     | 270.4                                                                             | 272.4                                                                             | 288.4                                                                              | 296.403                                                                             |
| <b>Log K<sub>ow</sub><sup>2</sup></b>                                        | 3.43                                                                              | 3.94                                                                              | 2.81                                                                               | 4.15                                                                                |
| <b>pKa<sup>3</sup></b>                                                       | 10.5-10.7                                                                         | 10.3-10.8                                                                         | 10.3-10.8                                                                          | 10.4 <sup>4</sup>                                                                   |
| <b>Water Solubility<sup>2</sup></b>                                          | 13                                                                                | 13                                                                                | 13                                                                                 | 4.8                                                                                 |
| <b>Henry's Law Constant (atm m<sup>3</sup> mol<sup>-1</sup>)<sup>5</sup></b> | 3.8x10 <sup>-10</sup>                                                             | 3.64x10 <sup>-11</sup>                                                            | 1.33x10 <sup>-12</sup>                                                             | 7.94x10 <sup>-12</sup>                                                              |
| <b>Vapor Pressure<sup>2</sup></b>                                            | 2.3x10 <sup>-10</sup>                                                             | 2.3x10 <sup>-10</sup>                                                             | 6.7x10 <sup>-15</sup>                                                              | 4.5x10 <sup>-11</sup>                                                               |

23

24

25

## 26 S2: X-Ray Diffraction Patterns

27 X-ray diffraction (XRD) patterns of the ferric and ferrous flocs were obtained using a Bruker D8  
28 Discover A25 diffractometer with a copper  $K\alpha$  radiation to determine their crystalline phases.  
29 The XRD scans were recorded from  $2\theta$  of  $10^\circ - 70^\circ$  using a step size of  $0.02^\circ$  and a count time of  
30 0.4 s per step.  
31

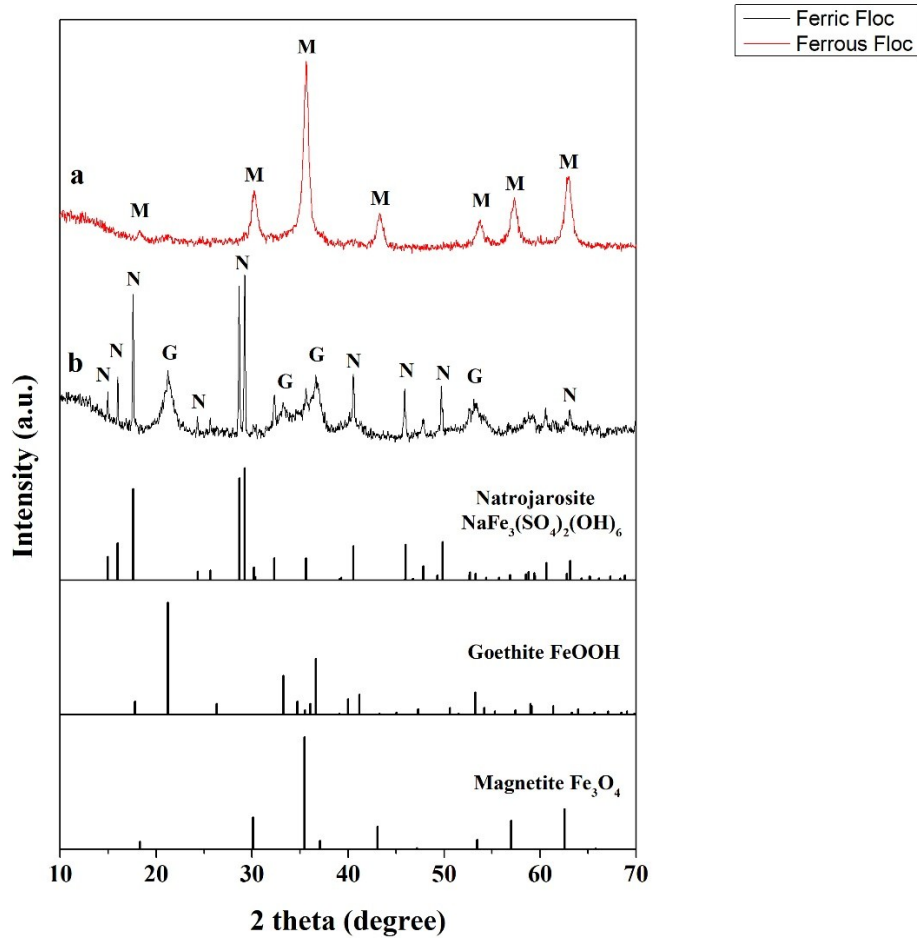

32

33 Figure S1. XRD patterns of iron flocs produced from conventional coagulation jar tests using (a)  
34  $\text{FeSO}_4$  and (b)  $\text{Fe}_2(\text{SO}_4)_3$ . The reference patterns for goethite (G, 29-0713), magnetite (M, 65-  
35 3107), and natrojarosite (N, 51-1567) are included for comparison.  
36

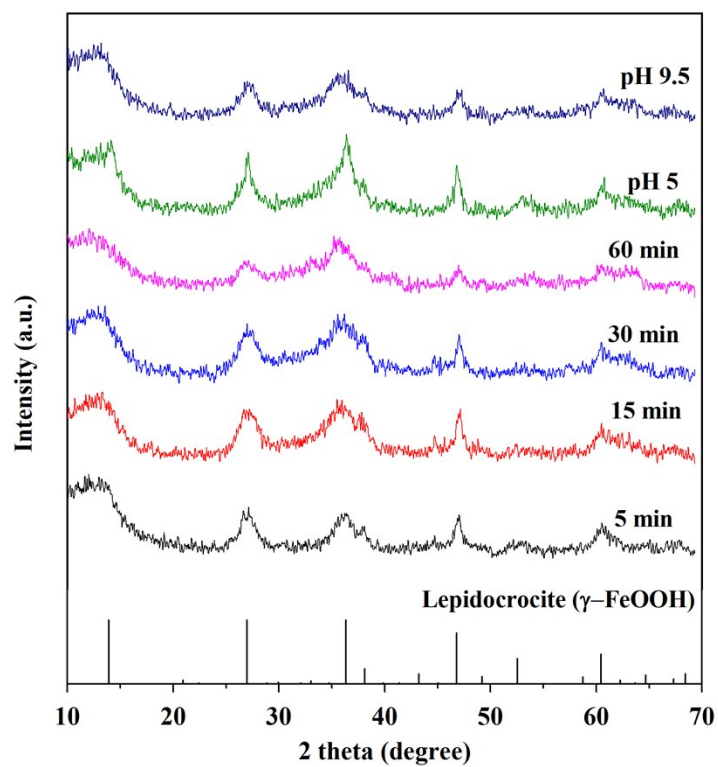

37  
38 Figure S2. XRD patterns of iron floc produced at different pH values and electrocoagulation  
39 times. The reference pattern for lepidocrocite (01-0136) is included for comparison.

40 **S3: Post-hoc Statistical Analysis P-values**

41 **Table S2.** Post-hoc p-values with Fisher's LSD for Multiple Comparisons at Variable pH

| Estradiol (E1)             |            |                     |              |         |
|----------------------------|------------|---------------------|--------------|---------|
| Fisher's LSD               | Mean Diff. | 95.00% CI of diff.  | Significant? | P Value |
| pH 5.5 vs. pH 7.0          | -0.3738    | -0.4897 to -0.2579  | Yes          | 0.0002  |
| pH 5.5 vs. pH 9.5          | -0.7919    | -0.9078 to -0.676   | Yes          | <0.0001 |
| pH 7.0 vs. pH 9.5          | -0.4181    | -0.534 to -0.3022   | Yes          | 0.0001  |
| 17β- Estradiol (E2)        |            |                     |              |         |
| Fisher's LSD               | Mean Diff. | 95.00% CI of diff.  | Significant? | P Value |
| pH 5.5 vs. pH 7.0          | -0.571     | -0.6584 to -0.4835  | Yes          | <0.0001 |
| pH 5.5 vs. pH 9.5          | -0.9274    | -1.015 to -0.8399   | Yes          | <0.0001 |
| pH 7.0 vs. pH 9.5          | -0.3564    | -0.4439 to -0.2689  | Yes          | <0.0001 |
| Estriol (E3)               |            |                     |              |         |
| Fisher's LSD               | Mean Diff. | 95.00% CI of diff.  | Significant? | P Value |
| pH 5.5 vs. pH 7.0          | -0.424     | -0.5426 to -0.3053  | Yes          | 0.0001  |
| pH 5.5 vs. pH 9.5          | -0.7667    | -0.8854 to -0.648   | Yes          | <0.0001 |
| pH 7.0 vs. pH 9.5          | -0.3427    | -0.4614 to -0.2241  | Yes          | 0.0004  |
| 17α-Ethynylestradiol (EE2) |            |                     |              |         |
| Fisher's LSD               | Mean Diff. | 95.00% CI of diff.  | Significant? | P Value |
| pH 5.5 vs. pH 7.0          | -0.1295    | -0.1772 to -0.08182 | Yes          | 0.0006  |
| pH 5.5 vs. pH 9.5          | 0.2091     | 0.1614 to 0.2567    | Yes          | <0.0001 |
| pH 7.0 vs. pH 9.5          | 0.3386     | 0.2909 to 0.3862    | Yes          | <0.0001 |

42

43 **Table S3.** Post-hoc p-values with Fisher's LSD for Multiple Comparisons at Variable Turbidities

| Estradiol (E1)             |            |                    |              |         |
|----------------------------|------------|--------------------|--------------|---------|
| Fisher's LSD               | Mean Diff. | 95.00% CI of diff. | Significant? | P Value |
| 0.0 NTU vs. 2.0 NTU        | 0.1251     | -0.02172 to 0.272  | No           | 0.085   |
| 0.0 NTU vs. 60.0 NTU       | -0.05162   | -0.1985 to 0.09522 | No           | 0.441   |
| 2.0 NTU vs. 60.0 NTU       | -0.1768    | -0.3127 to -0.0408 | Yes          | 0.0171  |
| 17β- Estradiol (E2)        |            |                    |              |         |
| Fisher's LSD               | Mean Diff. | 95.00% CI of diff. | Significant? | P Value |
| 0.0 NTU vs. 2.0 NTU        | 0.321      | 0.1744 to 0.4676   | Yes          | 0.001   |
| 0.0 NTU vs. 60.0 NTU       | 0.09973    | -0.04685 to 0.2463 | No           | 0.1553  |
| 2.0 NTU vs. 60.0 NTU       | -0.2213    | -0.357 to -0.08554 | Yes          | 0.0055  |
| 17α-Ethynylestradiol (EE2) |            |                    |              |         |
| Fisher's LSD               | Mean Diff. | 95.00% CI of diff. | Significant? | P Value |
| 0.0 NTU vs. 2.0 NTU        | 0.2854     | 0.1568 to 0.4141   | Yes          | 0.0009  |
| 0.0 NTU vs. 60.0 NTU       | 0.2728     | 0.1441 to 0.4015   | Yes          | 0.0012  |
| 2.0 NTU vs. 60.0 NTU       | -0.01262   | -0.1318 to 0.1065  | No           | 0.8131  |

44

45 **Table S4.** Post-hoc p-values with Fisher's LSD for Multiple Comparisons at Variable DOC

46 Concentrations

| 17β- Estradiol (E2)             |            |                    |              |         |
|---------------------------------|------------|--------------------|--------------|---------|
| Fisher's LSD                    | Mean Diff. | 95.00% CI of diff. | Significant? | P Value |
| 0.0 vs. 0.5 mg L <sup>-1</sup>  | -0.117     | -0.4257 to 0.1918  | No           | 0.4078  |
| 0.0 vs. 15.0 mg L <sup>-1</sup> | 0.3051     | -0.00363 to 0.6139 | No           | 0.0522  |
| 0.5 vs. 15.0 mg L <sup>-1</sup> | 0.4221     | 0.1362 to 0.708    | Yes          | 0.0093  |

47

48 **Table S5.** Post-hoc p-values for Fisher's LSD for Multiple Comparisons with EC vs Conventional  
 49 Coagulation

| Estradiol (E1)                      |            |                    |              |         |
|-------------------------------------|------------|--------------------|--------------|---------|
| Fisher's LSD                        | Mean Diff. | 95.00% CI of diff. | Significant? | P Value |
| EC with Iron vs. CC - Ferric        | 0.9123     | 0.6593 to 1.165    | Yes          | <0.0001 |
| EC with Iron vs. CC - Ferrous       | 0.6917     | 0.4387 to 0.9447   | Yes          | 0.0001  |
| CC - Ferric vs. CC - Ferrous        | -0.2205    | -0.4735 to 0.03248 | No           | 0.0808  |
| 17 $\beta$ - Estradiol (E2)         |            |                    |              |         |
| Fisher's LSD                        | Mean Diff. | 95.00% CI of diff. | Significant? | P Value |
| EC with Iron vs. CC - Ferric        | 0.9149     | 0.6642 to 1.166    | Yes          | <0.0001 |
| EC with Iron vs. CC - Ferrous       | 0.6829     | 0.4322 to 0.9336   | Yes          | 0.0001  |
| CC - Ferric vs. CC - Ferrous        | -0.232     | -0.4827 to 0.01872 | No           | 0.0662  |
| Estriol (E3)                        |            |                    |              |         |
| Fisher's LSD                        | Mean Diff. | 95.00% CI of diff. | Significant? | P Value |
| EC with Iron vs. CC - Ferric        | 0.7493     | 0.5818 to 0.9167   | Yes          | <0.0001 |
| EC with Iron vs. CC - Ferrous       | 0.6917     | 0.5242 to 0.8592   | Yes          | <0.0001 |
| CC - Ferric vs. CC - Ferrous        | -0.05757   | -0.225 to 0.1099   | No           | 0.4614  |
| 17 $\alpha$ -Ethinylestradiol (EE2) |            |                    |              |         |
| Fisher's LSD                        | Mean Diff. | 95.00% CI of diff. | Significant? | P Value |
| EC with Iron vs. CC - Ferric        | 0.7493     | 0.5818 to 0.9167   | Yes          | <0.0001 |
| EC with Iron vs. CC - Ferrous       | 0.6917     | 0.5242 to 0.8592   | Yes          | <0.0001 |
| CC - Ferric vs. CC - Ferrous        | -0.05757   | -0.225 to 0.1099   | No           | 0.4614  |

50

51 **Table S6.** Post-hoc p-values for Fisher's LSD for Multiple Comparisons for EC and Oxidant Scavenging  
 52 Tests

| Estradiol (E1)                  |            |                    |              |         |
|---------------------------------|------------|--------------------|--------------|---------|
| Fisher's LSD                    | Mean Diff. | 95.00% CI of diff. | Significant? | P Value |
| EC Only vs. EC with t-BuOH      | 0.1824     | 0.01885 to 0.346   | Yes          | 0.0342  |
| EC Only vs. EC with MeOH        | 0.3384     | 0.1749 to 0.502    | Yes          | 0.0023  |
| EC with t-BuOH vs. EC with MeOH | 0.156      | -0.00752 to 0.3196 | No           | 0.0583  |
| 17 $\beta$ - Estradiol (E2)     |            |                    |              |         |
| Fisher's LSD                    | Mean Diff. | 95.00% CI of diff. | Significant? | P Value |
| EC Only vs. EC with t-BuOH      | 0.38       | 0.2492 to 0.5107   | Yes          | 0.0004  |
| EC Only vs. EC with MeOH        | 0.5553     | 0.4246 to 0.6861   | Yes          | <0.0001 |
| EC with t-BuOH vs. EC with MeOH | 0.1754     | 0.04461 to 0.3061  | Yes          | 0.0168  |
| Estriol (E3)                    |            |                    |              |         |
| Fisher's LSD                    | Mean Diff. | 95.00% CI of diff. | Significant? | P Value |
| EC Only vs. EC with t-BuOH      | 0.225      | 0.04136 to 0.4086  | Yes          | 0.0241  |
| EC Only vs. EC with MeOH        | 0.487      | 0.3034 to 0.6706   | Yes          | 0.0006  |
| EC with t-BuOH vs. EC with MeOH | 0.262      | 0.07836 to 0.4456  | Yes          | 0.013   |

\*EE2 was removed below the detection limit.

53

54

55 **S4: Ultrasonic Assisted Extraction**

56 **Table S7.**

|                                                   |   | Estradiol<br>(E1) | 17 $\beta$ -<br>Estradiol<br>(E2) | Estriol<br>(E3) | 17 $\alpha$ -<br>Ethinylestradiol<br>(EE2) |
|---------------------------------------------------|---|-------------------|-----------------------------------|-----------------|--------------------------------------------|
| LOD ( $\mu\text{g L}^{-1}$ )                      |   | 27                | 3                                 | 3               | 13                                         |
| LOQ ( $\mu\text{g L}^{-1}$ )                      |   | 107               | 14                                | 14              | 51                                         |
| Initial Concentration<br>( $\mu\text{g L}^{-1}$ ) |   | 460               | 440                               | 469             | 452                                        |
| Final Concentration<br>( $\mu\text{g L}^{-1}$ )   |   | N.D.              | <14                               | <14             | <51                                        |
| Percent Removal<br>(%)                            |   | 100               | 98                                | 98              | 97                                         |
| Spiked Sample*<br>( $\mu\text{g L}^{-1}$ )        | 1 | 130               | 80                                | 87              | 65                                         |
|                                                   | 2 | 121               | 87                                | 94              | 69                                         |
|                                                   | 3 | 138               | 96                                | 101             | 77                                         |
| Unspiked Sample<br>( $\mu\text{g L}^{-1}$ )       | 1 | N.D.              | <14                               | <14             | N.D.                                       |
|                                                   | 2 | N.D.              | <14                               | <14             | N.D.                                       |
|                                                   | 3 | N.D.              | <14                               | <14             | N.D.                                       |
| Average Percent<br>Recovery (%)                   |   | 137               | 116                               | 126             | 108                                        |
| Standard Deviation                                |   | 19                | 9                                 | 8               | 7                                          |

\*Spiked concentration were 68  $\mu\text{g L}^{-1}$  for E1, 69  $\mu\text{g L}^{-1}$  for E2 and E3, and 65  $\mu\text{g L}^{-1}$  for EE2.

N.D. = Non-detect

57

58

59

60

61

62

63

64

65 **S5: Oxidation**

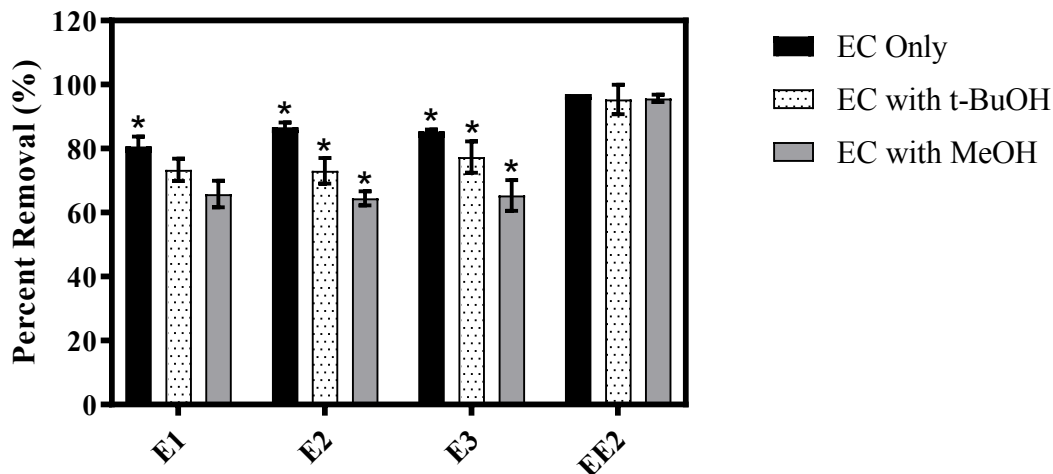

66

67 Figure S3. Removal of E1, E2, E3, and EE2 for an EC test with iron electrodes (n=3) compared  
 68 to a test with oxidant scavengers of 0.25 M t-BuOH (n=3) or 0.95 M MeOH (n=3). E1, E2, and  
 69 E3 were significantly different for all tests (p-values < 0.007). There was no significant  
 70 difference for EE2 (p-value =0.77). The error bars represent the standard error of the mean.  
 71 Asterisks indicate significant difference between all other conditions within a single estrogenic  
 72 compound. Bars indicate difference between specific conditions.

73

74 **Table S8.** EE2 dosed EC reactor results for transformation to E1, E2, and E3

| Test | Time (min.) | E1    |            | E2   |           | E3   |           | EE2    |           |
|------|-------------|-------|------------|------|-----------|------|-----------|--------|-----------|
|      |             | Area  | S/N* Ratio | Area | S/N Ratio | Area | S/N Ratio | Area   | S/N Ratio |
| 1    | 0           | N.P.  | N.P.       | N.P. | N.P.      | N.P. | N.P.      | 290053 | 140.19    |
|      | 5           | 4675  | 3.6        | N.P. | N.P.      | N.P. | N.P.      | 223636 | 123.24    |
|      | 120         | 12701 | 3.98       | N.P. | N.P.      | N.P. | N.P.      | N.P.   | N.P.      |
| 2    | 0           | N.P.  | N.P.       | N.P. | N.P.      | N.P. | N.P.      | 286970 | 137.65    |
|      | 5           | 9614  | 3.72       | N.P. | N.P.      | N.P. | N.P.      | 246019 | 119.68    |
|      | 120         | 12719 | 4.89       | N.P. | N.P.      | N.P. | N.P.      | N.P.   | N.P.      |

N.P. = No peak

S/N Ratio = signal-to-noise ratio

\*S/N Ratio  $\geq$  3.0 sample is detectable; S/N Ratio  $\geq$  10.0 sample is quantifiable.

Data indicate that E1 was formed from oxidation of EE2

75



76 **Table S9.** E2 dosed EC reactor results for transformation to E1, EE2, and E3

| Test | Time (min.) | E1   |            | E2     |           | E3   |           | EE2  |           |
|------|-------------|------|------------|--------|-----------|------|-----------|------|-----------|
|      |             | Area | S/N* Ratio | Area   | S/N Ratio | Area | S/N Ratio | Area | S/N Ratio |
| 1    | 0           | N.P. | N.P.       | 47574  | 118.9     | N.P. | N.P.      | N.P. | N.P.      |
|      | 120         | N.P. | N.P.       | 19042  | 25.62     | 1651 | 3.45      | N.P. | N.P.      |
| 2    | 0           | N.P. | N.P.       | 133863 | 318.1     | N.P. | N.P.      | N.P. | N.P.      |
|      | 120         | N.P. | N.P.       | 26517  | 5.1       | 8750 | 8.25      | N.P. | N.P.      |

N.P. = No peak

S/N Ratio = signal-to-noise ratio

\*S/N Ratio  $\geq 3.0$  sample is detectable; S/N Ratio  $\geq 10.0$  sample is quantifiable.

Data indicate that E3 was formed from oxidation of E2

77

78

79 **References**

- 80 1 ChemSpider | Search and share chemistry, <http://www.chemspider.com/>, (accessed 13  
81 December 2018).
- 82 2 G. G. Ying, R. S. Kookana and Y. J. Ru, *Environ. Int.*, 2002, 28, 545–551.
- 83 3 T. A. Hanselman, D. A. Graetz and A. C. Wilkie, *Environ. Sci. Technol.*, 2003, 37, 5471–  
84 5478.
- 85 4 M. I. Toral, F. Nacaratte, F. Nova-Ramírez and R. Otipka, *J. Chil. Chem. Soc.*, 2013, 58,  
86 1779–1784.
- 87 5 C. Zhang, Y. Li, C. Wang and W. Cai, , DOI:10.1080/10643389.2015.1061881.  
88
